# Supplementary material for: A novel one-pot facile economic approach for the mass synthesis of exfoliated multilayered nitrogen-doped graphene-like nanosheets: new insights into the mechanistic study
Source: Royal Society of Chemistry journal article supplement (doi:10.1039/c9cp01418g), 2019-01-01
Supplement: c9cp01418g1.pdf [file c9cp01418g1.pdf]

### Electronic Supplementary Information (ESI)

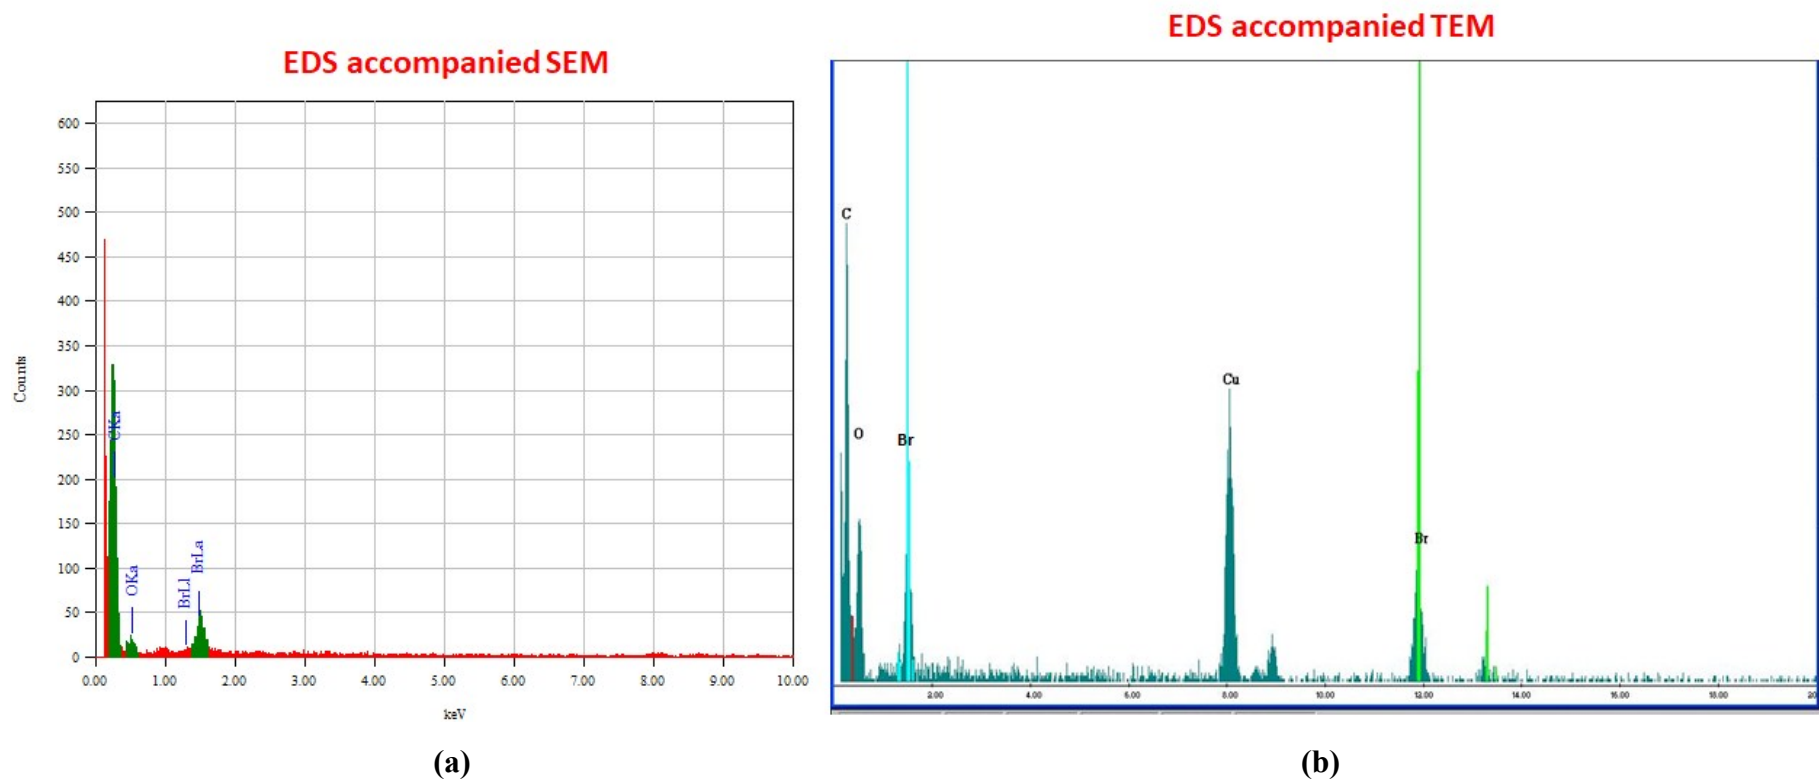

Fig. S1 EDS analysis of H-NGs270 accompanied (a) SEM and (b) TEM microscopy

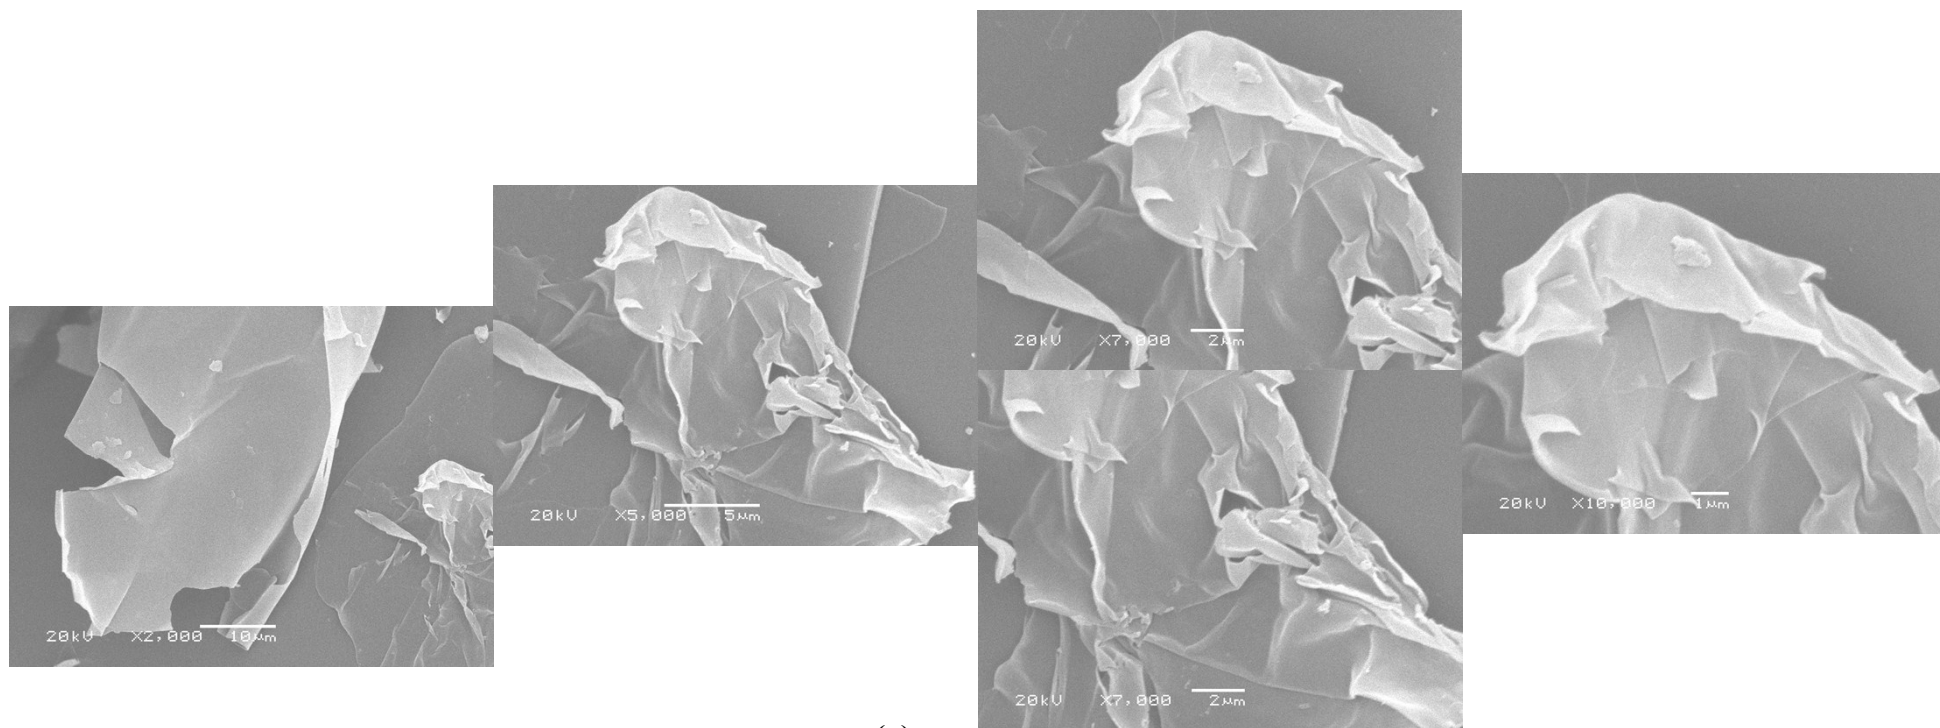

(a)

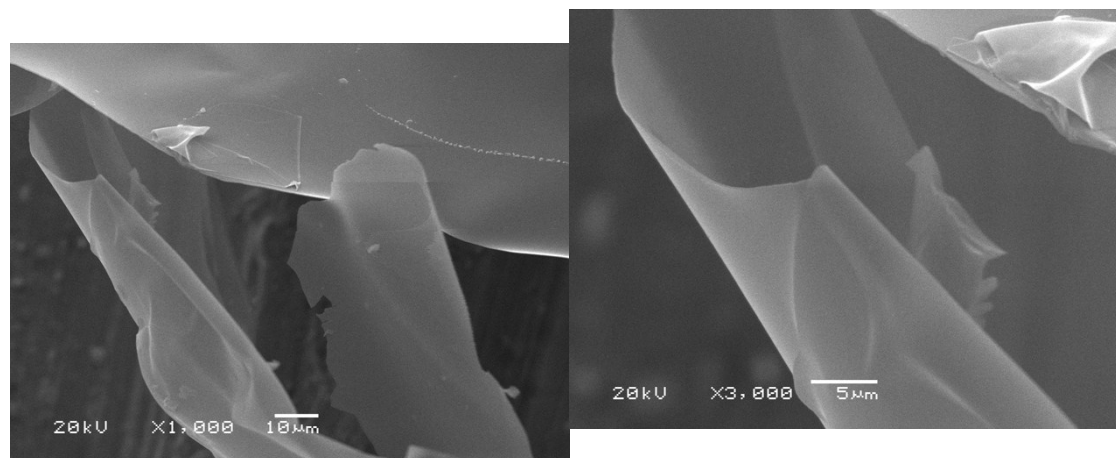

(b)

**Fig. S2 SEM imaging of H-NGs270 captured gradually from low to high magnifications at two different regions.  
(a) Region 1 and (b) Region 2**

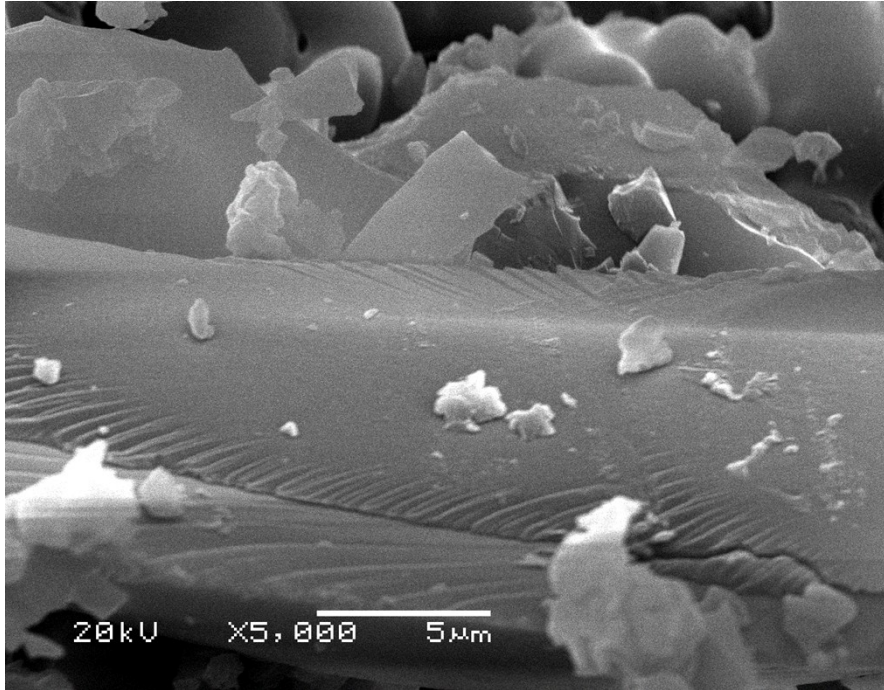

(a)

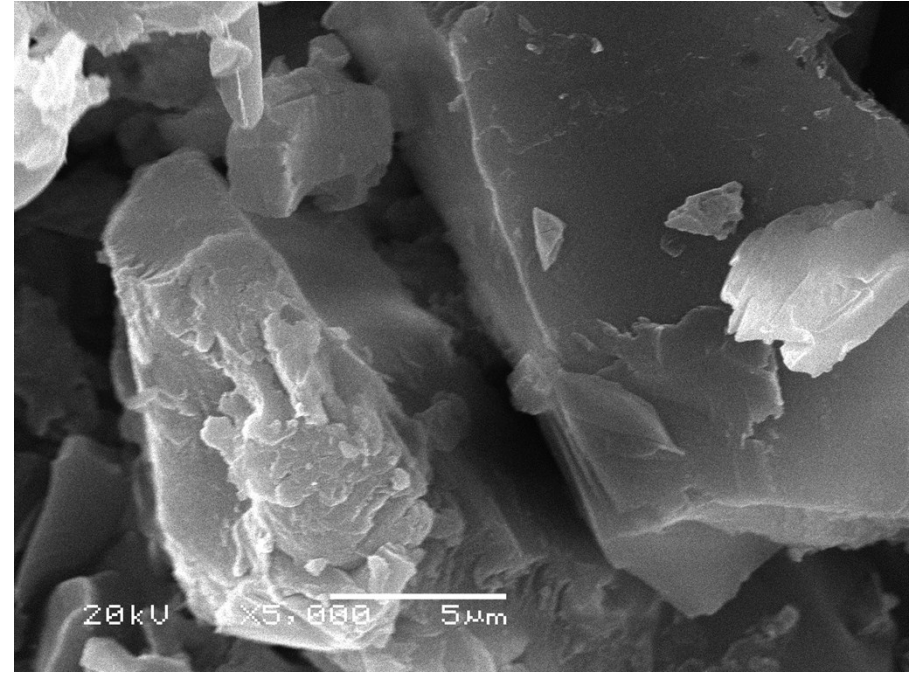

(b)

**Fig. S3 SEM micrographs of HTA-NG600 at two different regions. (a) Region 1 and (b) Region 2**

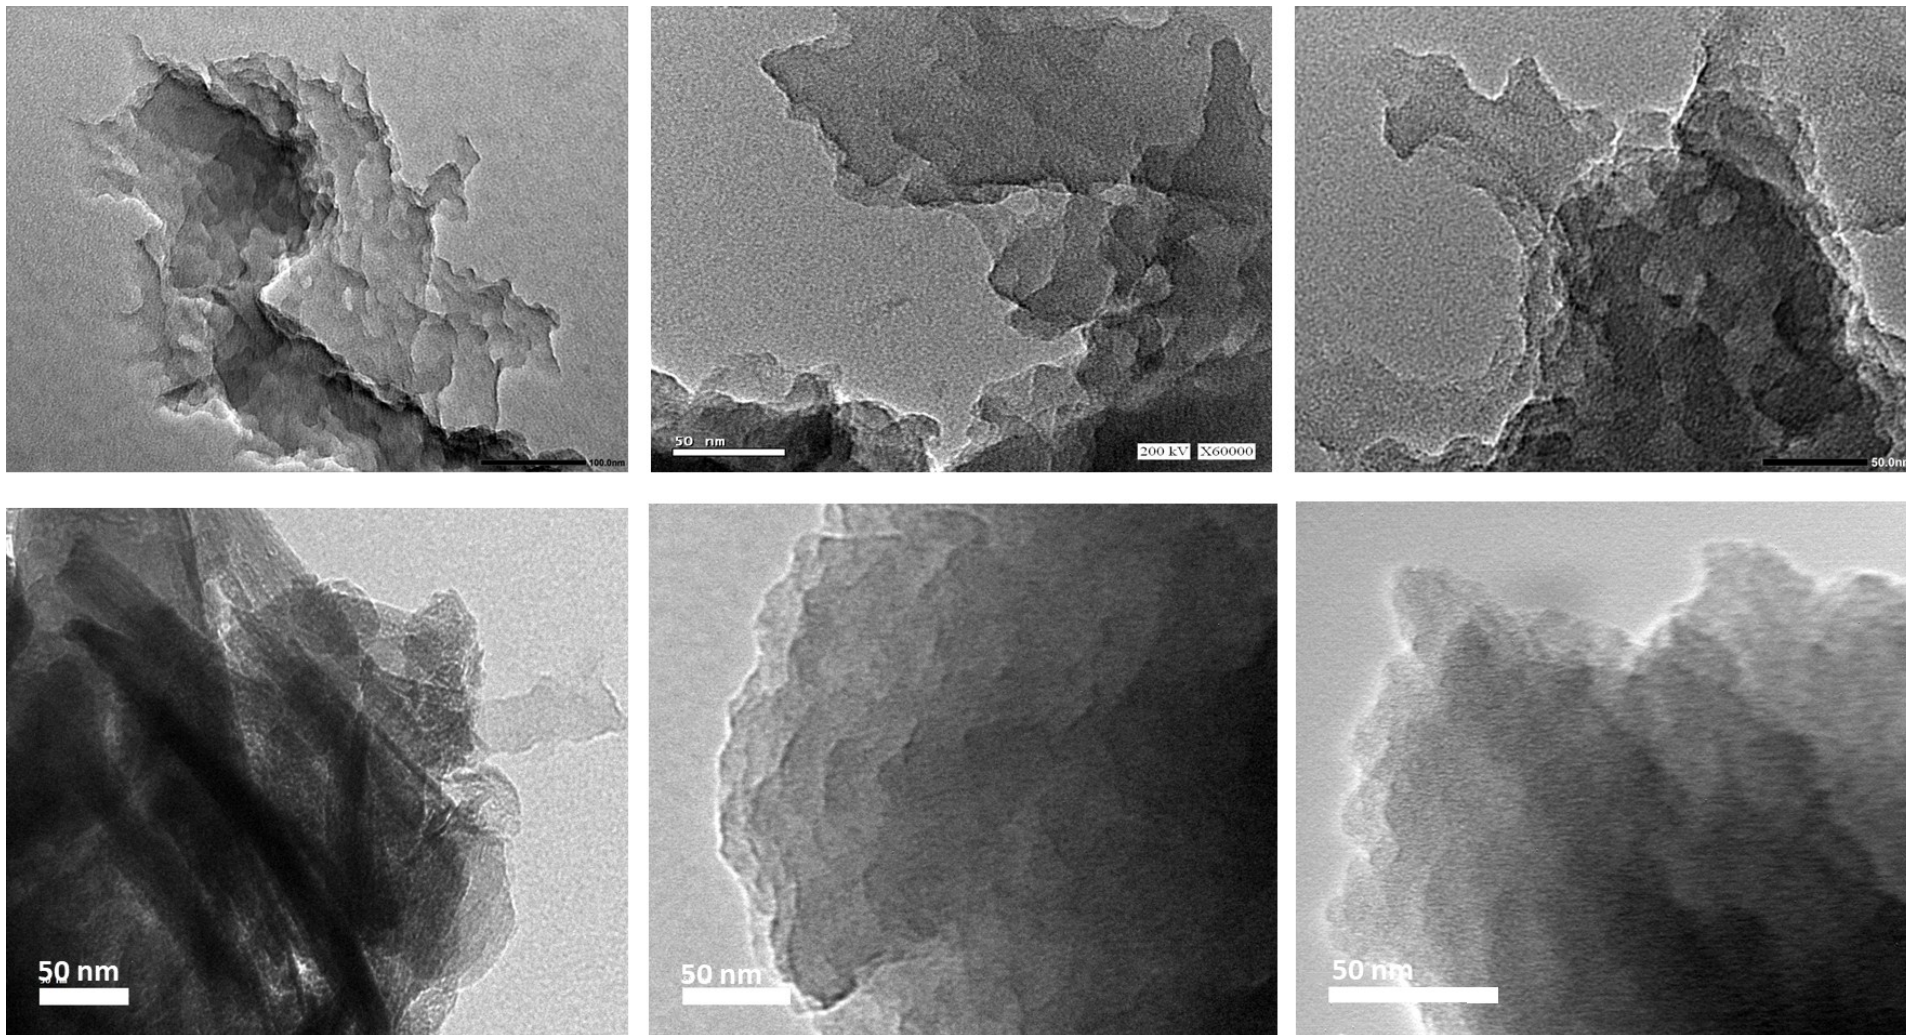

**Fig. S4** Low magnification HR-TEM micrographs of H-NGs270 at various regions within the sample

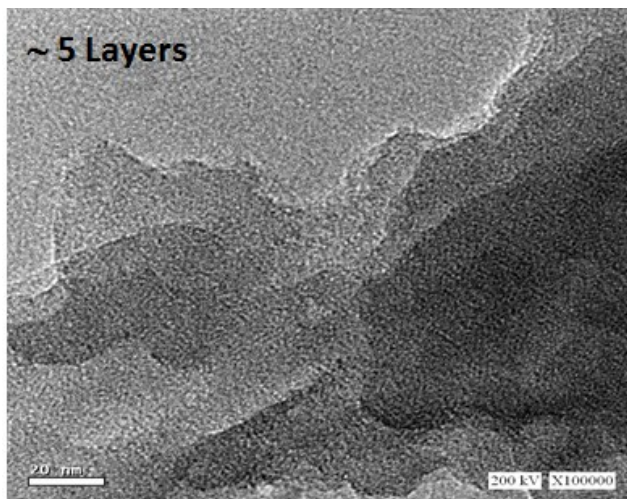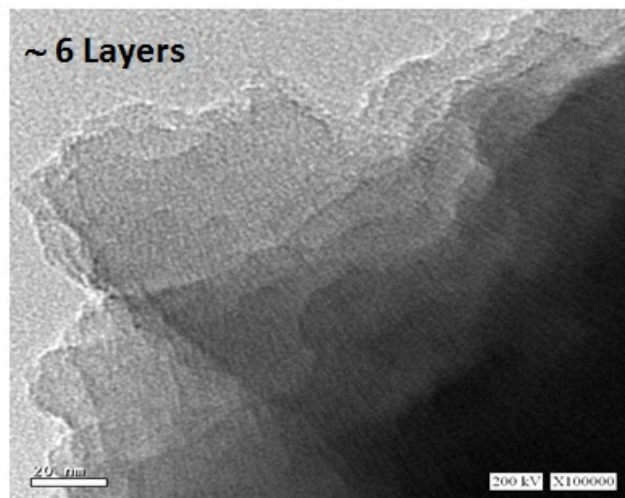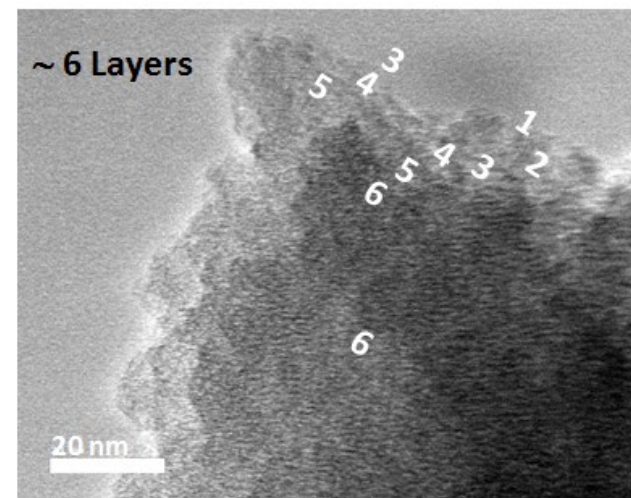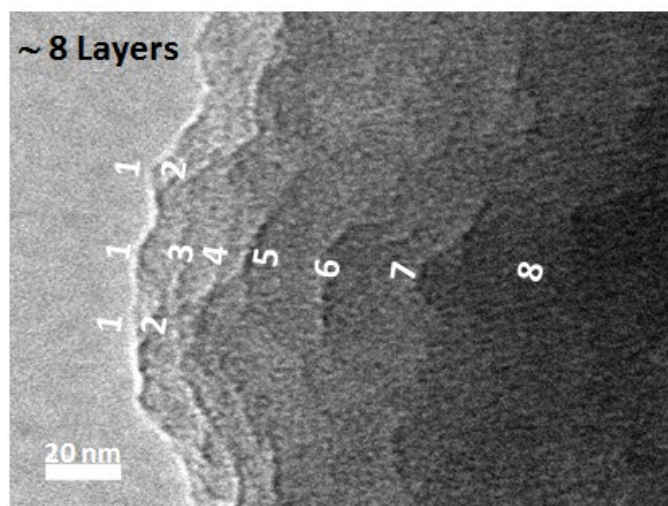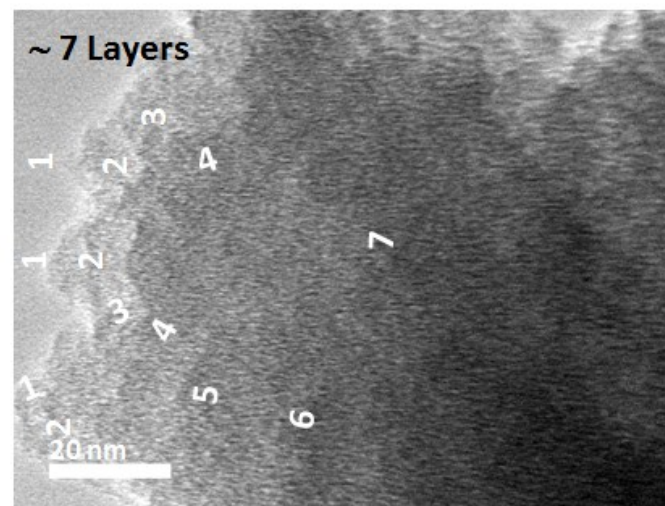

**Fig. S5 High magnification HR-TEM micrographs of H-NGs270 at various regions within the sample**

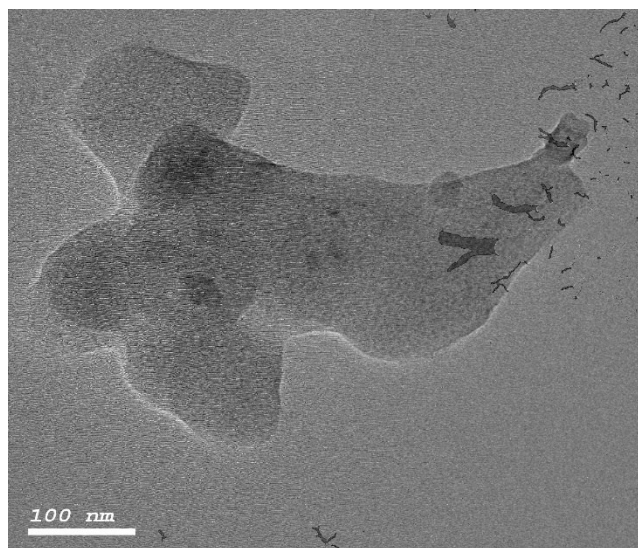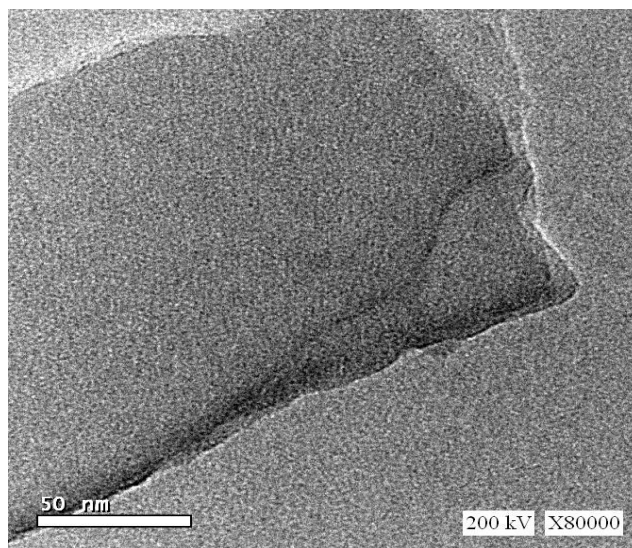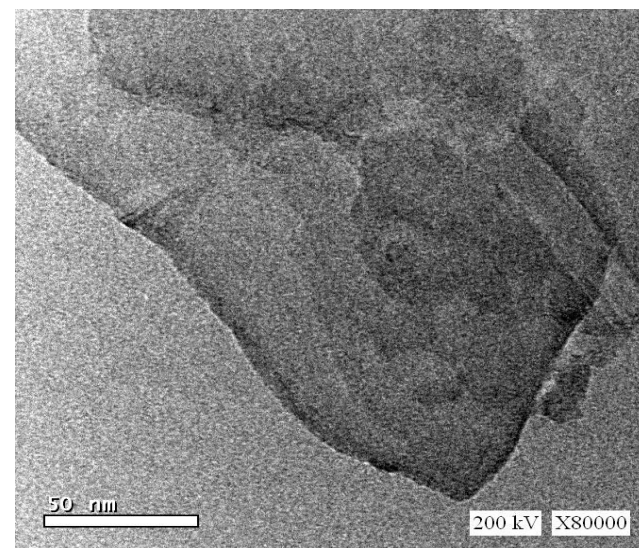

(a)

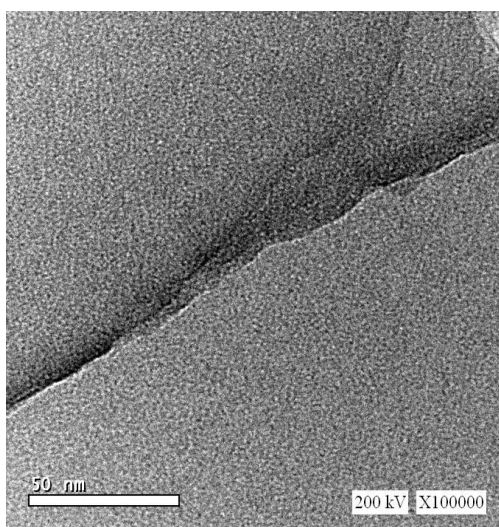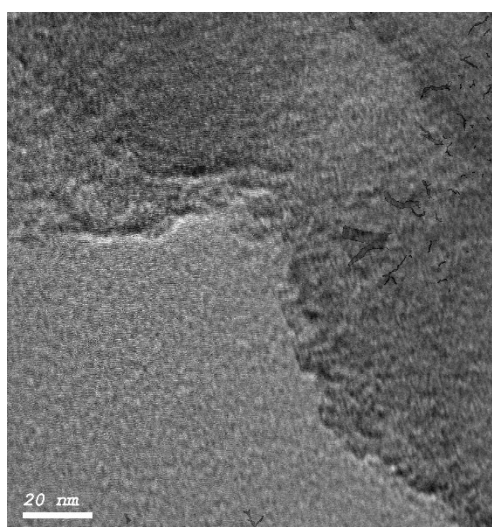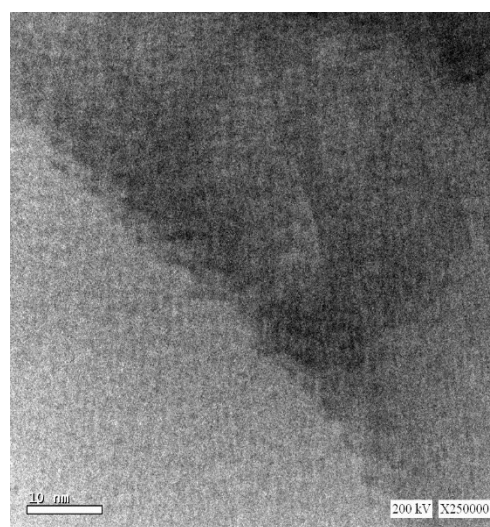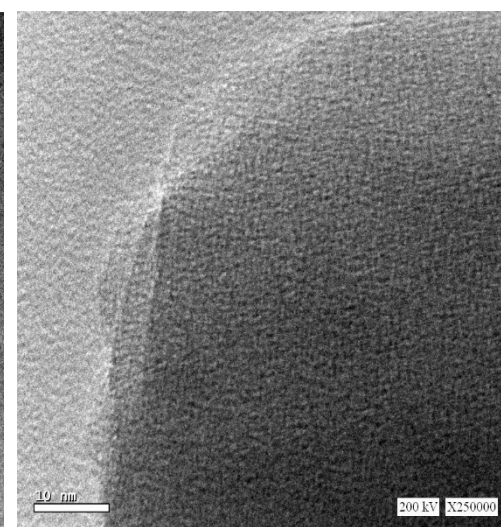

(b)

Fig. S6 HR-TEM micrographs of HTA-NG600 at various regions. (a) low magnification and (b) high magnification
